# Supplementary material
Source: PubMed Central journal article supplement (PMC5474182)
Supplement: NIHMS856235-supplement-Suppl.pdf [file NIHMS856235-supplement-Suppl.pdf]

**Supplemental Table 1:** Deletion mutants used in this study

| <b>Strain</b>                                             | <b>Deleted gene</b> | <b>Gene function</b>        | <b>Phenotype</b>                              |
|-----------------------------------------------------------|---------------------|-----------------------------|-----------------------------------------------|
| EDL933 $\Delta$ <i>stx2</i><br>86-24 $\Delta$ <i>stx2</i> | <i>stx2B</i>        | Stx2 B-subunit production   | Stx2-deficient                                |
| EDL933 $\Delta$ <i>N</i>                                  | <i>N</i>            | Regulates most 933W genes   | Phage not produced; Stx2-deficient            |
| EDL933 $\Delta$ <i>int</i>                                | <i>int</i>          | Regulates prophage excision | Stx2 and phage produced, prophage not excised |
| EDL933 $\Delta$ <i>escN</i>                               | <i>escN</i>         | Encodes type 3 ATPase       | No type 3 secretion                           |

**Supplemental Table 2:** Scoring criteria for colon epithelial necrosis and neutrophil infiltrate

| Lesion                                 | Score =0 | Score=1                  | Score=2                                       | Score =3                                                      |
|----------------------------------------|----------|--------------------------|-----------------------------------------------|---------------------------------------------------------------|
| Colon epithelial necrosis or apoptosis | None     | Occasional surface cells | Many surface cells affected                   | Most to all surface cells, lesion extends into glands         |
| Neutrophil infiltrate                  | None     | Occasional PMNs          | Scattered PMNs with at least several clusters | Many clusters or widespread infiltration in most of the field |

**Supplemental Table 3:** Splenic necrosis in mice infected with EDL933 or non-pathogenic *E. coli*

| Infection group               | N  | Normal | Necrosis present | Necrosis severe |
|-------------------------------|----|--------|------------------|-----------------|
| Uninfected                    | 6  | 6      | 0                | 0               |
| Non-pathogenic <i>E. coli</i> | 7  | 7      | 0                | 0               |
| EDL933                        | 72 | 12     | 55               | 5               |
